# Supplementary material for: Surface treatment via Li-bis-(trifluoromethanesulfonyl) imide to eliminate the hysteresis and enhance the efficiency of inverted perovskite solar cells
Source: Royal Society of Chemistry journal article supplement (doi:10.1039/c7tc03984k), 2017-01-01
Supplement: c7tc03984k1.pdf [file c7tc03984k1.pdf]

## Supporting Information

### **Surface treatment via Li-bis-(trifluoromethanesulfonyl) imide to Eliminate the Hysteresis and Enhance the Efficiency of Inverted Perovskite Solar Cells**

*Cong Chen<sup>1,2</sup>, Guang Yang<sup>1</sup>, Junjie Ma<sup>1</sup>, Xiaolu Zheng<sup>1</sup>, Zhiliang Chen<sup>1</sup>, Qi Zhang<sup>1</sup>,  
Guojia Fang<sup>1, 2\*</sup>*

<sup>1</sup> Key Lab of Artificial Micro- and Nano-Structures of Ministry of Education of China, School of Physics and Technology, Wuhan University, Wuhan 430072, People's Republic of China

<sup>2</sup> Shenzhen Institute, Wuhan University, Shenzhen 518055, People's Republic of China

## **Experimental Section**

### **Materials**

All the chemicals were purchased and used without further purification. CH<sub>3</sub>NH<sub>3</sub>I and PbI<sub>2</sub> were purchased from TCI. [6,6]-phenyl-C61-butyric acid methyl ester (PCBM) was obtained from NANO-C, chlorobenzene, Dimethyl sulfoxide (DMSO) and N,N-dimethylformamide (DMF) were supplied from Aldrich. Others are from Sinopharm Group.

### **NiO<sub>x</sub> film fabrication**

FTO glass with sheet resistance of 15 Ω/□ was washed with detergent, followed sequentially by ultrasonication with deionized water, isopropyl alcohol and acetone for 10 min, respectively. The preparation of the NiO<sub>x</sub> films were prepared according to the previous report.<sup>1</sup> The precursor solution was prepared by dissolving 25.6 mg nickle acetylacetonate in 1 mL ethyl alcohol with 10 uL hydrochloric acid. The solution was stirred for 3 h at 40 °C in a sealed vial before deposition. The precursor solution was deposited on the clean FTO substrates by spin coating at 3000 rpm for 30 s and then the substrates were annealed at 400 °C for 1h in air. For surface treatment, the as-prepared NiO<sub>x</sub> films were treated with the Li-TFSI/acetonitrile (20 mg/1 mL) at 3000 rpm for 30 s, followed by annealing at 300 °C for 1h in air.

### **Perovskite precursor preparation**

A 40 wt%  $\text{CH}_3\text{NH}_3\text{PbI}_3$  precursor solution was prepared by mixing  $\text{PbI}_2$ ,  $\text{CH}_3\text{NH}_3\text{I}$  and DMSO in DMF with a 1:1:1 molar ratio. The as-prepared precursor solutions were stirred at 60 °C overnight before spin-coating.

### **Device fabrication**

The perovskite precursor solution was spin-coated on the Li-treated  $\text{NiO}_x/\text{FTO}$  and the pristine  $\text{NiO}_x/\text{FTO}$  substrates at 4000 rpm for 30s via a fast deposition crystallization method or heterojunction engineering in a Ar-filled glove box. At the 10th second of the spinning, 300  $\mu\text{L}$  chlorobenzene or 300  $\mu\text{L}$  chlorobenzene dissolving moderate PCBM (1 mg/mL) was dropped. After the perovskite film was annealed at 100 °C for 10 min, a mixture solution of PCBM and chlorobenzene (20 mg  $\text{mL}^{-1}$ ) was spin-coated on the perovskite film at 2000 rpm for 30 s and then the substrate was baked at 80 °C for 10 min. Next, a thin layer of BCP (0.5 mg in 1 mL alcohol) was deposited on the top of PCBM layer. Finally, a 70 nm of silver was deposited by thermal evaporation under a vacuum of  $\sim 1 \times 10^{-6}$  Torr. The active area of the device is 0.09  $\text{cm}^2$ .

### **Perovskite device characterization**

Hall effect measurements was conducted with a hall measurement system (LakeShore 7704A) at room temperature in dark using van der Pauw geometry. The topographic images of  $\text{NiO}_x/\text{FTO}$  and Li-treated  $\text{NiO}_x/\text{FTO}$  were characterized by atomic force microscopy (AFM) (SPM-9500J3, Shimadzu, Japan). The cross-sectional image of the PSC with Li-

TFSI treatment and the top morphologies of perovskite layer on different substrates were observed by a field emission scanning electron microscope (FESEM) (JSM 6700F, Japan). The current density-voltage (J-V) curves of the PSCs were measured on a CHI 660D electrochemical workstation (Shanghai Chenhua Instruments, China) with a standard ABET Sun 2000 Solar Simulator. A standard silicon solar cell was used to calibrate the light intensity. The external quantum efficiency (EQE) was conducted by a QE/IPCE system (Enli Technology Co. Ltd. China) in the range of 300~800 nm wavelength. Ultraviolet-visible transmittance and absorbance spectra were measured by an ultraviolet-visible (UV-vis) spectrophotometer (CARY5000, Varian, Australia). Steady-state photoluminescence (PL) spectra were measured by a FLS980 Spectrometer-Edinburgh Instruments. The excitation wavelength was 488 nm. The electrochemical impedance spectra (EIS) were conducted on a CHI 660D electrochemical workstation (Shanghai Chenhua Instruments, China) over a frequency range of 1 MHz ~ 1 Hz applied at 0 bias in the dark. The obtained spectra were fitted with ZView software. The kinetic energy spectra of the NiO<sub>x</sub> films with and without Li-TFSI treatment were characterized by an ultraviolet photoelectron spectroscopy (UPS) system (Thermo Scientific, Escalate 250Xi). The crystallinity of perovskite films was examined by an X-ray diffraction (XRD) (D8 Advance, Bruker AXS, Germany).

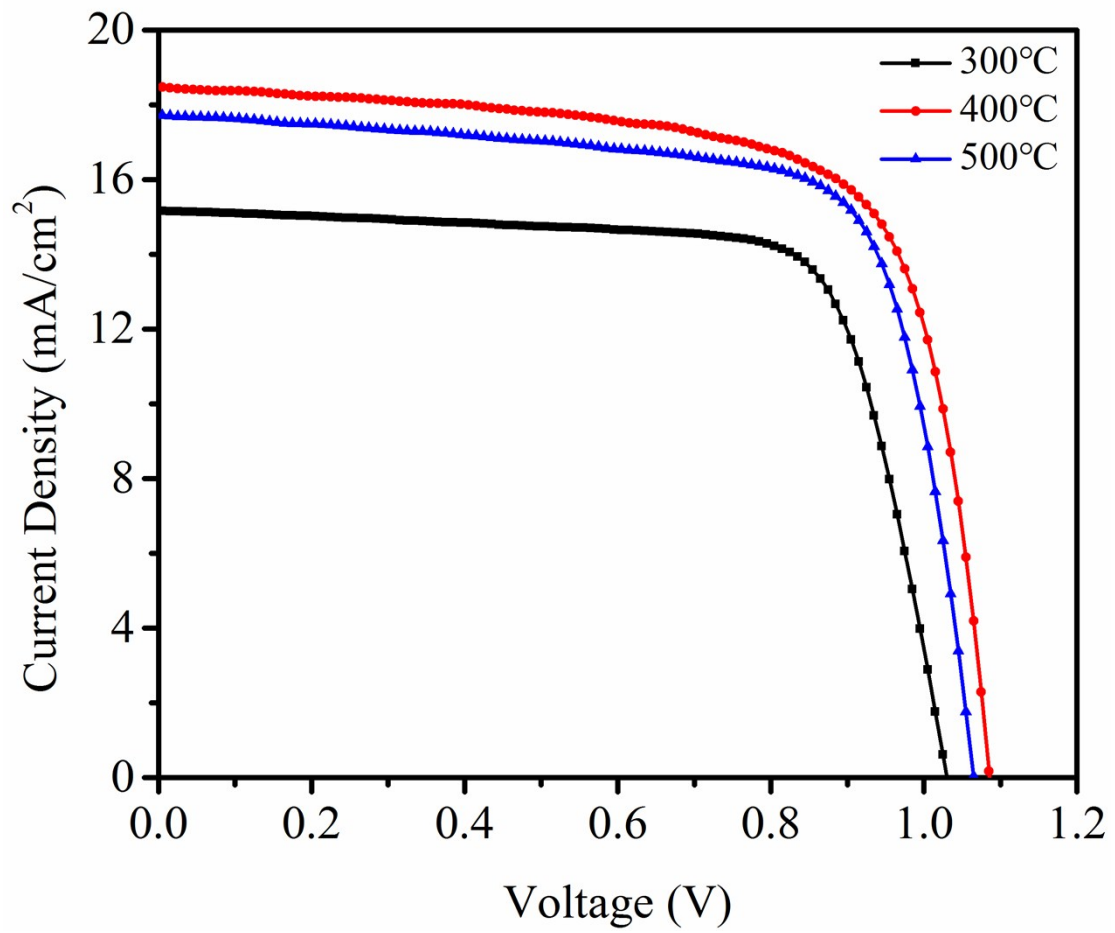

**Fig. S1** The J-V curves of the perovskite solar cells (PSCs) based on the NiO<sub>x</sub> hole transport layer (HTL) with different annealing temperature.

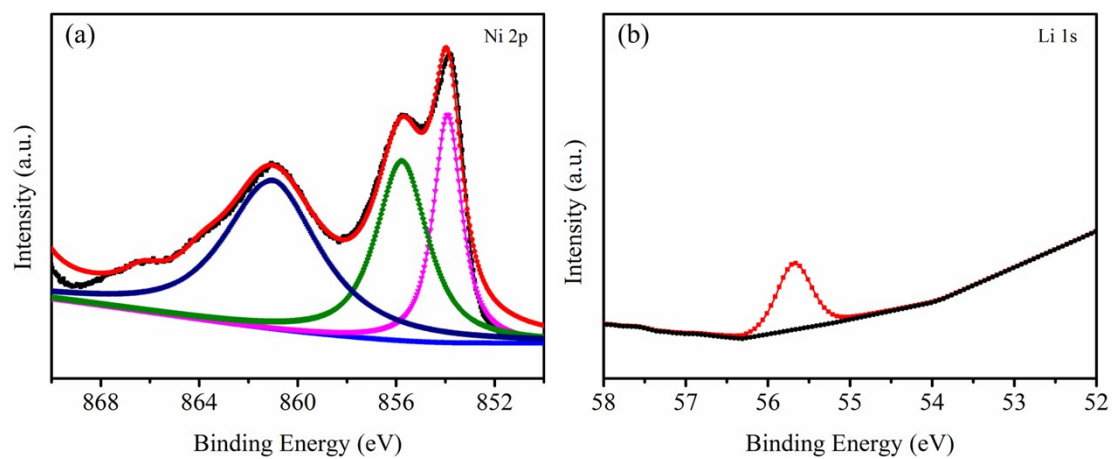

**Fig. S2** XPS spectra of (a) Ni 2p and (b) Li 1s peaks for Li-treated NiO<sub>x</sub> film.

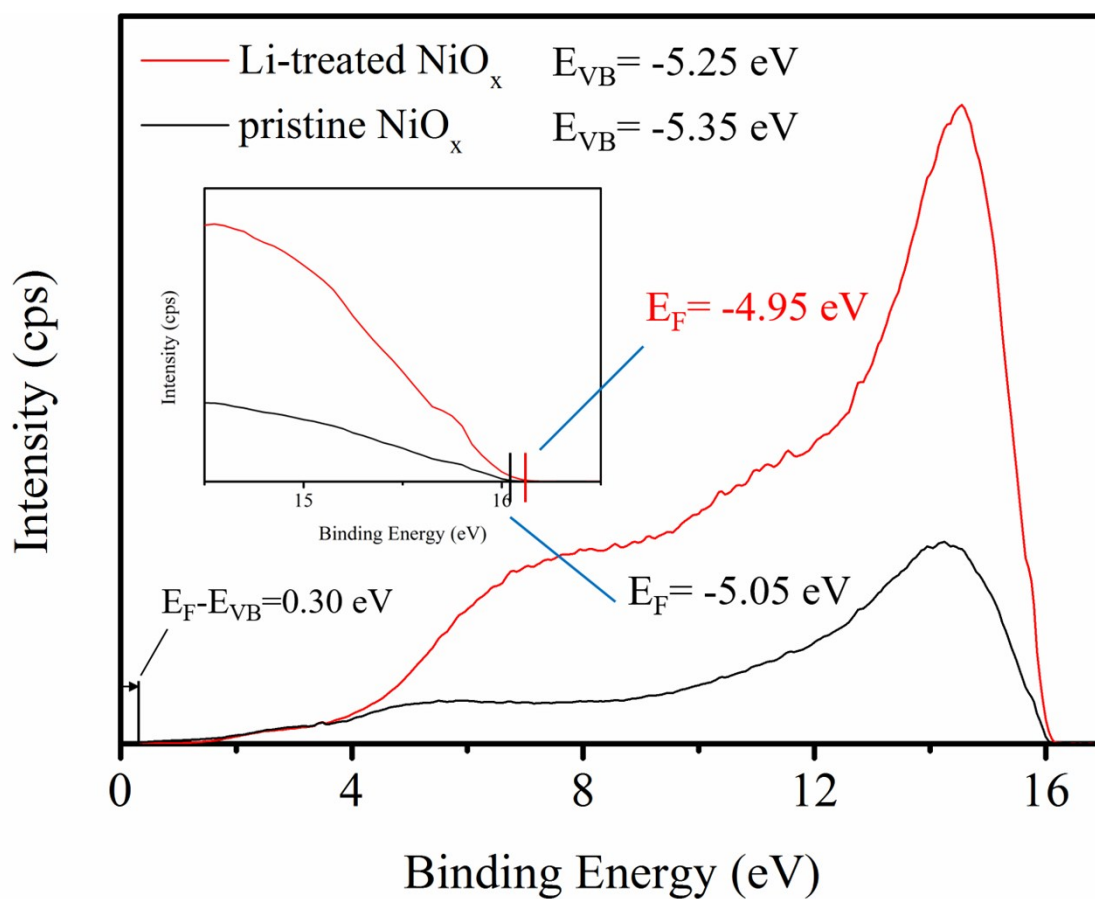

**Fig. S3** Ultraviolet photoelectron spectra of the pristine NiO<sub>x</sub> and Li-treated NiO<sub>x</sub> films. Inset is the magnification of secondary cut-off region near binding energy 16 eV.

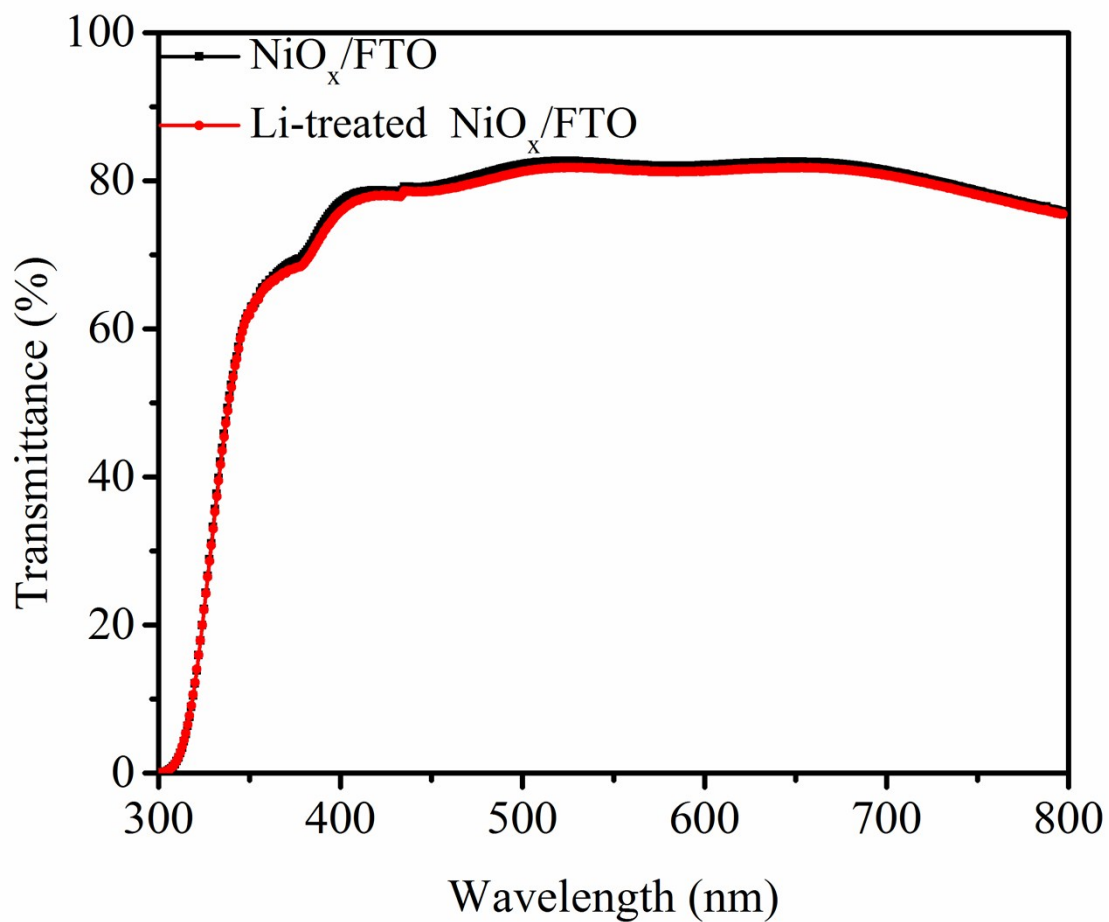

**Fig. S4** Transmission spectra of FTO with NiO<sub>x</sub> film and Li-treated NiO<sub>x</sub> film.



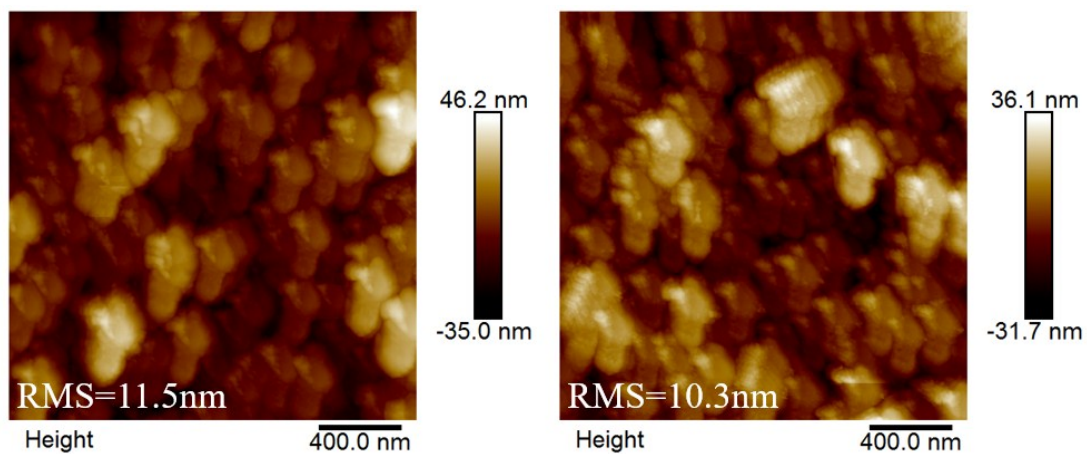

**Fig. S5** AFM images of FTO substrates with NiO<sub>x</sub> film and Li-treated NiO<sub>x</sub> film.

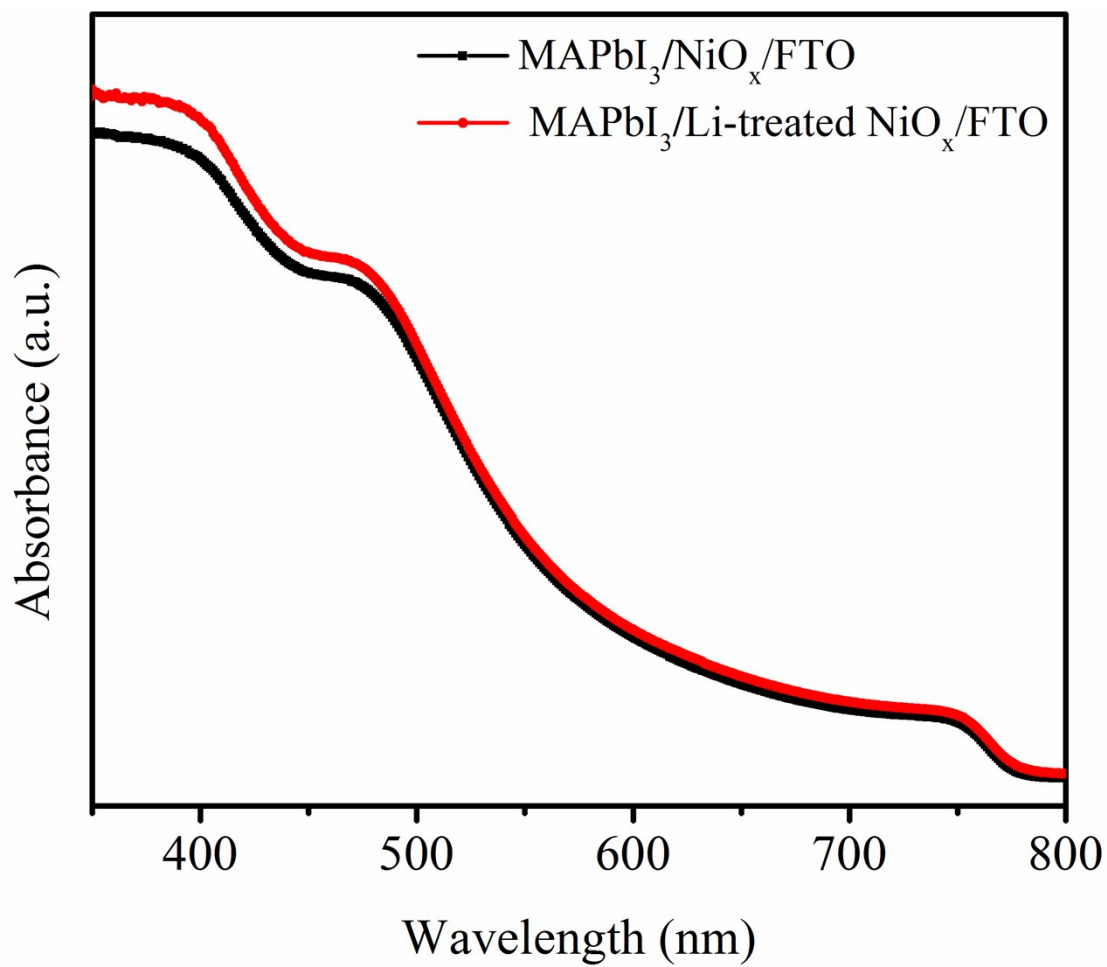

**Fig. S6** UV-VIS absorption spectra of perovskite layers on the NiO<sub>x</sub> and Li-treated NiO<sub>x</sub> substrates.

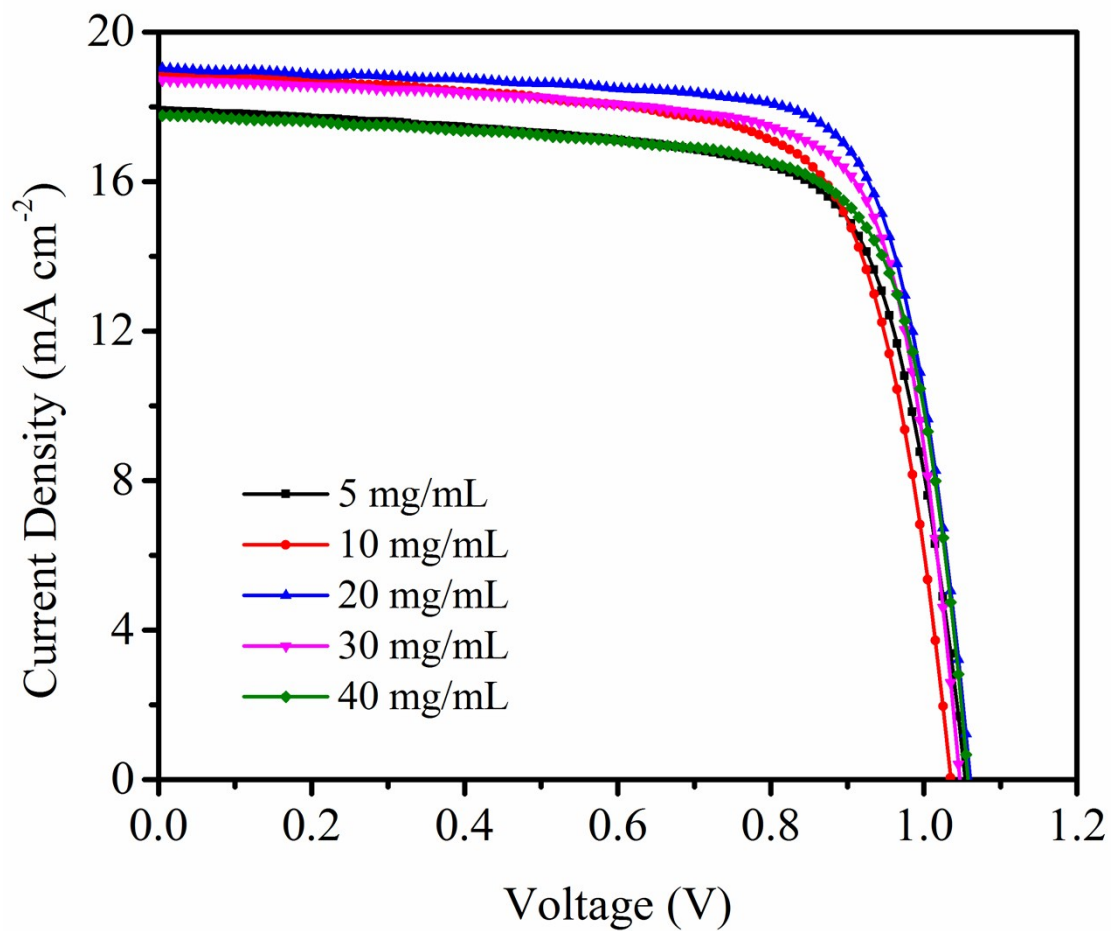

**Fig. S7** The J-V curves of the PSCs based on the NiO<sub>x</sub> HTL treated with different concentration of Li-TFSI solution.

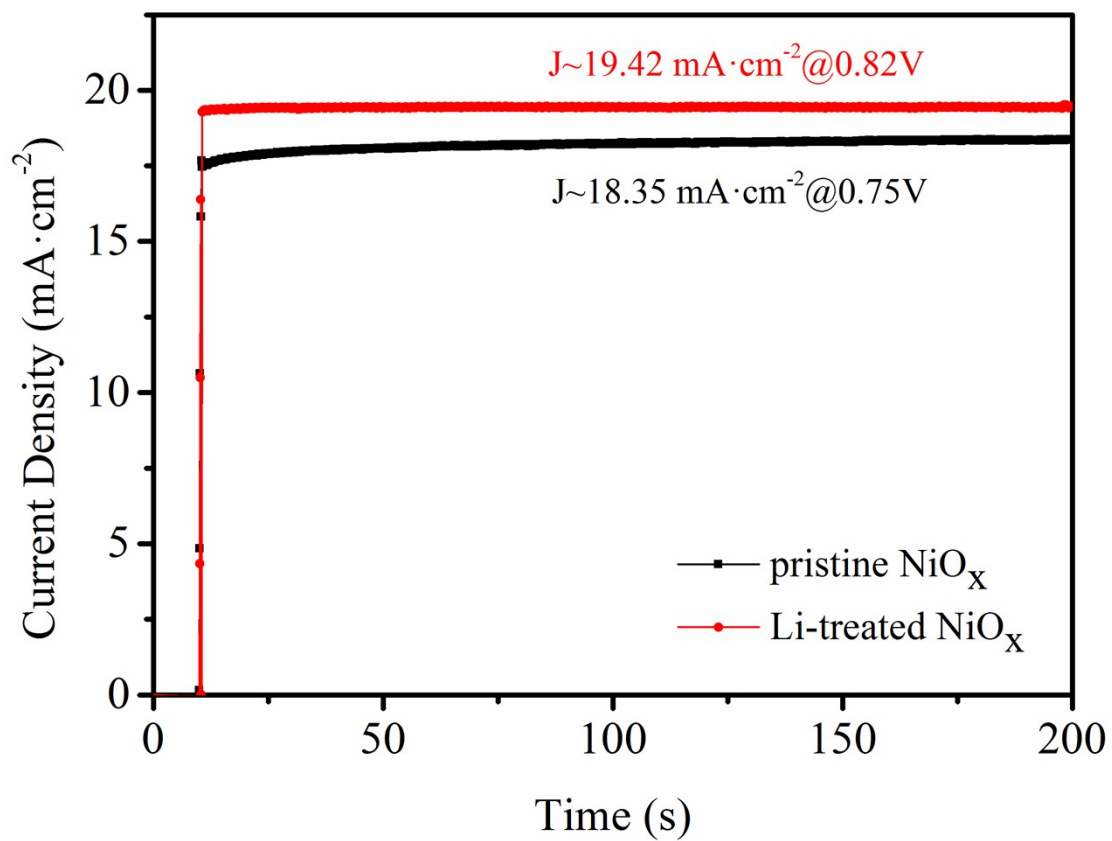

**Fig. S8** Steady-state current density curves of the PSCs based on the Li-treated NiO<sub>x</sub> and pristine NiO<sub>x</sub> as a function of time.

**Table S1** device performance parameters for different annealing temperature of NiO<sub>x</sub> films. Average photovoltaic parameters with standard deviations were obtained based on 15 cells for each set.

| Temperature (°C) | V <sub>oc</sub> (V) | J <sub>sc</sub> (mA cm <sup>-2</sup> ) | FF (%)     | PCE (%)    |
|------------------|---------------------|----------------------------------------|------------|------------|
| 300              | 1.03±0.01           | 15.82±1.64                             | 71.20±2.80 | 11.63±1.11 |
| 400              | 1.04±0.01           | 17.83±0.47                             | 72.50±1.10 | 13.54±0.44 |
| 500              | 1.07±0.01           | 18.15±0.52                             | 66.90±3.40 | 13.02±0.65 |

**Table S2** Electrical properties of NiO<sub>x</sub> film modified with different concentration of Li-TFSI solution.

| Li-TFSI salt treatment concentration | Conductivity (S cm <sup>-1</sup> ) | Carrier Density (cm <sup>-3</sup> ) |
|--------------------------------------|------------------------------------|-------------------------------------|
| 0 mg/mL Li-TFSI                      | $3.6 \times 10^{-4}$               | $3.63 \times 10^{14}$               |
| 5 mg/mL Li-TFSI                      | $4.2 \times 10^{-4}$               | $3.95 \times 10^{14}$               |
| 10 mg/mL Li-TFSI                     | $6.6 \times 10^{-4}$               | $6.55 \times 10^{14}$               |
| 20 mg/mL Li-TFSI                     | $7.0 \times 10^{-4}$               | $2.52 \times 10^{15}$               |
| 30 mg/mL Li-TFSI                     | $4.1 \times 10^{-4}$               | $1.38 \times 10^{15}$               |
| 40 mg/mL Li-TFSI                     | $3.5 \times 10^{-4}$               | $1.16 \times 10^{14}$               |

**Table S3** device performance parameters for different concentration of Li-TFSI solution treatment. Average photovoltaic parameters with standard deviations were obtained based on 30 cells for each set.

| Li-TFSI concentration | $V_{oc}$ (V) | $J_{sc}$ (mA cm <sup>-2</sup> ) | FF          | PCE (%)      |
|-----------------------|--------------|---------------------------------|-------------|--------------|
| 5 mg/mL               | 1.05 ± 0.02  | 17.77 ± 1.13                    | 0.71 ± 0.03 | 13.41 ± 0.99 |
| 10 mg/mL              | 1.05 ± 0.01  | 18.14 ± 1.82                    | 0.74 ± 0.03 | 14.04 ± 1.67 |
| 20 mg/mL              | 1.06 ± 0.01  | 18.83 ± 0.78                    | 0.76 ± 0.01 | 15.26 ± 0.61 |
| 30 mg/mL              | 1.05 ± 0.02  | 18.39 ± 1.31                    | 0.74 ± 0.03 | 14.43 ± 1.25 |
| 40 mg/mL              | 1.04 ± 0.02  | 17.55 ± 2.43                    | 0.73 ± 0.03 | 13.51 ± 1.88 |

## Reference

1. Z. Zhu, Y. Bai, X. Liu, C. C. Chueh, S. Yang and A. K. Jen, *Adv. Mater.*, 2016, **28**, 6478-6484.
